# Supplementary material for: β-Cyclodextrin Supramolecular Recognition of bis-Cationic Dithienylethenes
Source: MDPI journal article supplement (doi:10.3390/org3020005), 2022-04-06
Supplement: s1 [file s1]

## **$\beta$ -Cyclodextrin Supramolecular Recognition of *bis*-Cationic Dithienylethenes**

Giulio Bianchini,<sup>a</sup> Mattia Bazan,<sup>a</sup> Fabrizio Fabris,<sup>a</sup> Alessandro Scarso<sup>a,\*</sup>

*a) Dipartimento di Scienze Molecolari e Nanosistemi, Università Ca' Foscari di Venezia, via Torino 155, 30172 Mestre Venezia, Italy. E-mail: [alesca@unive.it](mailto:alesca@unive.it); Fax: +39-041-234-8517; Tel: +39-041-234-8569.*

### **Experimental section.**

**Figure S1.** *Cyclodextrin* recognition of photochrome 1o. **A)** 1o ( $7.00 \cdot 10^{-3}$  M) +  $\beta$ -CD ( $7.00 \cdot 10^{-3}$  M) in D<sub>2</sub>O; **B)**  $\beta$ -CD ( $7.00 \cdot 10^{-3}$  M) in D<sub>2</sub>O; **C)** 1o ( $7.00 \cdot 10^{-3}$  M) in D<sub>2</sub>O.

**Figure S2.** *Cyclodextrin* recognition of photochrome 1c. **A)** 1c ( $7.00 \cdot 10^{-3}$  M) +  $\beta$ -CD ( $7.00 \cdot 10^{-3}$  M) in D<sub>2</sub>O; **B)**  $\beta$ -CD ( $7.00 \cdot 10^{-3}$  M) in D<sub>2</sub>O; **C)** 1c ( $7.00 \cdot 10^{-3}$  M) in D<sub>2</sub>O., <sup>1</sup>H-NMR spectra.

**Figure S3.** *Cyclodextrin* recognition of photochrome 2o. **A)** 2o ( $7.00 \cdot 10^{-3}$  M) +  $\beta$ -CD ( $7.00 \cdot 10^{-3}$  M) in D<sub>2</sub>O; **B)**  $\beta$ -CD ( $7.00 \cdot 10^{-3}$  M) in D<sub>2</sub>O; **C)** 2o ( $7.00 \cdot 10^{-3}$  M) in D<sub>2</sub>O., <sup>1</sup>H-NMR spectra.

**Figure S4.** *Cyclodextrin* recognition of photochrome 2c. **A)** 2c ( $7.00 \cdot 10^{-3}$  M) +  $\beta$ -CD ( $7.00 \cdot 10^{-3}$  M) in D<sub>2</sub>O; **B)**  $\beta$ -CD ( $7.00 \cdot 10^{-3}$  M) in D<sub>2</sub>O; **C)** 2c ( $7.00 \cdot 10^{-3}$  M) in D<sub>2</sub>O., <sup>1</sup>H-NMR spectra.

**Figure S5.** *Proton d* area expansion of NOESY 1H-NMR <sup>of</sup> 1o ( $7.00 \cdot 10^{-3}$  M) +  $\beta$ -CD ( $7.00 \cdot 10^{-2}$  M) in D<sub>2</sub>O.

**Figure S6.** *Proton c* area expansion of NOESY 1H-NMR <sup>of</sup> 1o ( $7.00 \cdot 10^{-3}$  M) +  $\beta$ -CD ( $7.00 \cdot 10^{-2}$  M) in D<sub>2</sub>O.

**Figure S7.** *Proton d'* area expansion of NOESY 1H-NMR <sup>of</sup> 2o ( $7.00 \cdot 10^{-3}$  M) +  $\beta$ -CD ( $7.00 \cdot 10^{-2}$  M) in D<sub>2</sub>O.

**Table S1.** Diffusion coefficients for  $\beta$ -CD, 1o, 1c and their inclusion complexes 1o@ $\beta$ -CD, 1c@ $\beta$ -CD determined by <sup>1</sup>H-NMR DOSY.

**Figure S8.** *DOSY:* 1o ( $7.00 \cdot 10^{-3}$  M) +  $\beta$ -CD ( $7.00 \cdot 10^{-3}$  M) diffusing at the same rate in D<sub>2</sub>O.

**Figure S9.** *DOSY:* 1c ( $7.00 \cdot 10^{-3}$  M) +  $\beta$ -CD ( $7.00 \cdot 10^{-3}$  M) diffusing at the same rate in D<sub>2</sub>O.

**Table S2.** *DOSY:* 1c ( $7.00 \cdot 10^{-3}$  M) +  $\beta$ -CD ( $7.00 \cdot 10^{-3}$  M) diffusing at the same rate in D<sub>2</sub>O.

**Figure S10.** *DOSY:* 2o ( $7.00 \cdot 10^{-3}$  M) +  $\beta$ -CD ( $7.00 \cdot 10^{-3}$  M) diffusing at the same rate in D<sub>2</sub>O.

**Figure S11.** *DOSY:* 2c ( $7.00 \cdot 10^{-3}$  M) +  $\beta$ -CD ( $7.00 \cdot 10^{-3}$  M) diffusing at the same rate in D<sub>2</sub>O.

**Figure S12.** *Cyclodextrin* recognition of photochrome 1o and 1c, <sup>19</sup>F-NMR. **A)** 1o ( $7.00 \cdot 10^{-3}$  M) +  $\beta$ -CD ( $7.00 \cdot 10^{-3}$  M) in D<sub>2</sub>O; **B)** 1c ( $7.00 \cdot 10^{-3}$  M) +  $\beta$ -CD ( $7.00 \cdot 10^{-3}$  M) in D<sub>2</sub>O; **C)** 1o ( $7.00 \cdot 10^{-3}$  M) in D<sub>2</sub>O; **D)** 1c ( $7.00 \cdot 10^{-3}$  M) in D<sub>2</sub>O.

**Table S3.** 1o@ $\beta$ -CD Job's plot data and data treatment.

**Table S4.** 1c@ $\beta$ -CD Job's plot data and data treatment.

**Table S5.** **2o**@ $\beta$ -CD Job's plot data and data treatment.

**Table S6.** **2c**@ $\beta$ -CD Job's plot data and data treatment.

**Table S7.** Data **from** 1o titration **with**  $\beta$ -CD.

**Table S8.** Data **from** 1c titration **with**  $\beta$ -.

**Table S9.** Data **from** 2o titration **with**  $\beta$ -cyclodextrin.

**Table S10.** Data **from** 2c titration **with**  $\beta$ -cyclodextrin.

## Experimental section.

$^1\text{H}$ -NMR,  $^{13}\text{C}$ -NMR,  $^{19}\text{F}$ -NMR,  $^1\text{H}$ -NMR DOSY and NOESY  $^1\text{H}$ -NMR were recorded at 298 K with a Bruker 400 spectrometer.  $^1\text{H}$ -NMR DOSY spectra were recorded using 15 increments of gradient field strength from 2000 to 25000  $\text{G}\cdot\text{cm}^{-1}$ , 2 ms diffusion gradient length and 100 ms diffusion delay. NOESY  $^1\text{H}$ -NMR spectra were recorded using 500 ms mixing time.

Solvents and reactants were used as purchased; otherwise, they were purified as reported in W. L. F. Armarego, C. L. L. Chai *Purification of Laboratory Chemicals*, 5<sup>th</sup> Ed., **2003**, Elsevier, ISBN: 978-0-7506-7571-0. Compounds **1** and **2** were synthesized as reported by Lehn, J. M et al. *Chem. Eur. J.* **1995**, *5*, 275-284 and by Strukul, G. et al. *Chem. Commun.* **2013**, *49*, 5322-5324, Pace T. C. S., Müller V., S. Li, Lincoln P., Andréasson J., Enantioselective cyclization of photochromic dithienylethenes bound to DNA, *Angew. Chem. Int. Ed.* **2013**, *52*, 4393–4396; Li Z., Davidson-Rozenfeld G., Vázquez-González M., Fadeev M., Zhang J., Tian H., Willner I., Reversible Modulation of DNA-Based Hydrogel Shapes by Internal Stress Interactions, *J. Am. Chem. Soc.* 2018, *140*, 17691–17701; Yao X., Li T., Wang S., Ma X., Tian H., A photochromic supramolecular polymer based on bis-p-sulfonatocalix [4] arene recognition in aqueous solution, *Chem. Commun.* **2014**, *50*, 7166–7168.

Irradiation at 365 nm was performed with a Wood lamp, omnlux 25 W, irradiance at 365 nm 10  $\text{W}/\text{m}^2$  (10 cm) while irradiation at 254 nm was performed with the low-pressure Hg lamp commonly used for the visualization of TLC plates (12 W).

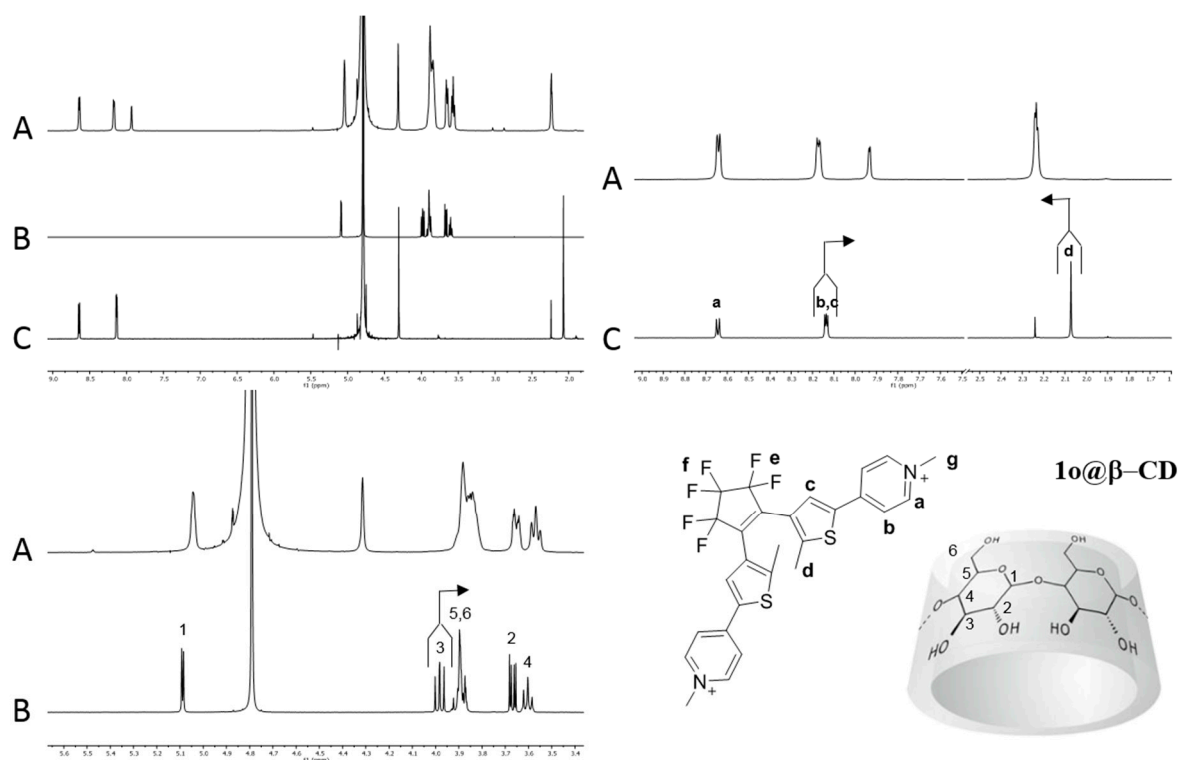

**Figure S1.** Cyclodextrin recognition of photochrome **1o**. **A)** **1o** ( $7.00\cdot 10^{-3}$  M) +  $\beta$ -CD ( $7.00\cdot 10^{-3}$  M) in  $\text{D}_2\text{O}$ ; **B)**  $\beta$ -CD ( $7.00\cdot 10^{-3}$  M) in  $\text{D}_2\text{O}$ ; **C)** **1o** ( $7.00\cdot 10^{-3}$  M) in  $\text{D}_2\text{O}$ .

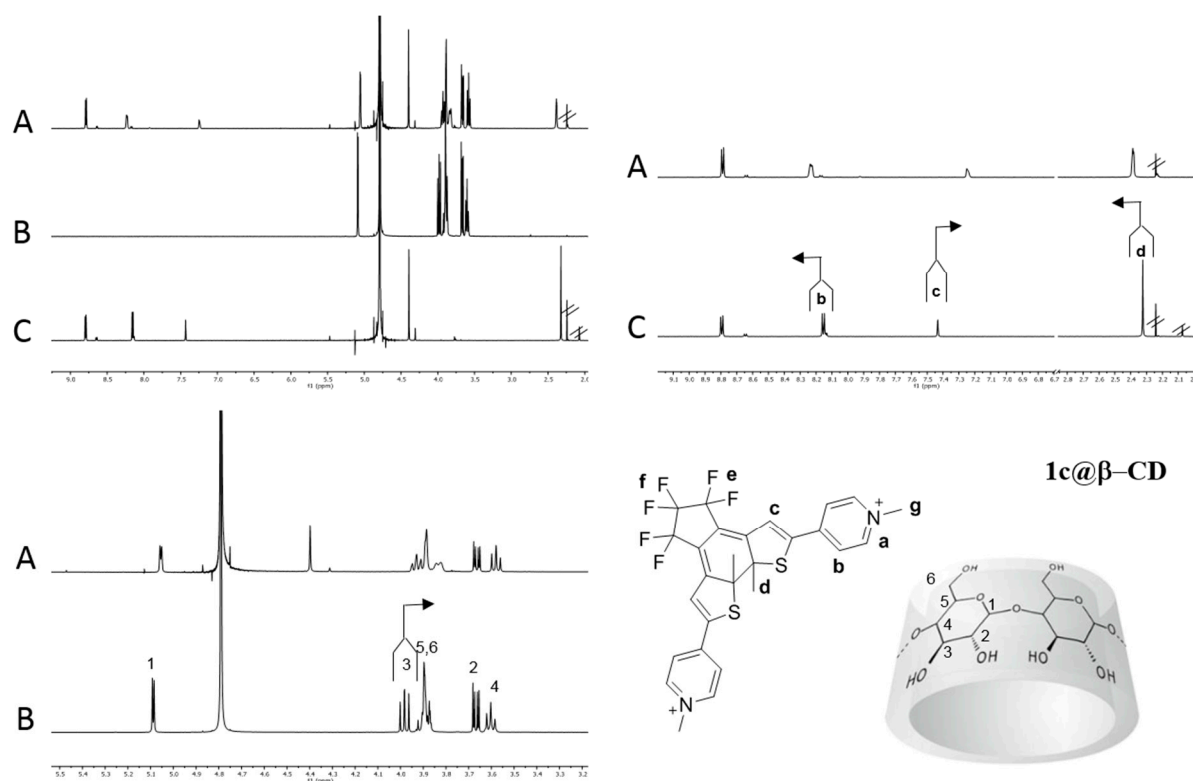

**Figure S2.** Cyclodextrin recognition of photochrome **1c**. **A)** **1c** (7.00  $\cdot$  10<sup>-3</sup> M) +  $\beta$ -CD (7.00  $\cdot$  10<sup>-3</sup> M) in D<sub>2</sub>O; **B)**  $\beta$ -CD (7.00  $\cdot$  10<sup>-3</sup> M) in D<sub>2</sub>O; **C)** **1c** (7.00  $\cdot$  10<sup>-3</sup> M) in D<sub>2</sub>O.

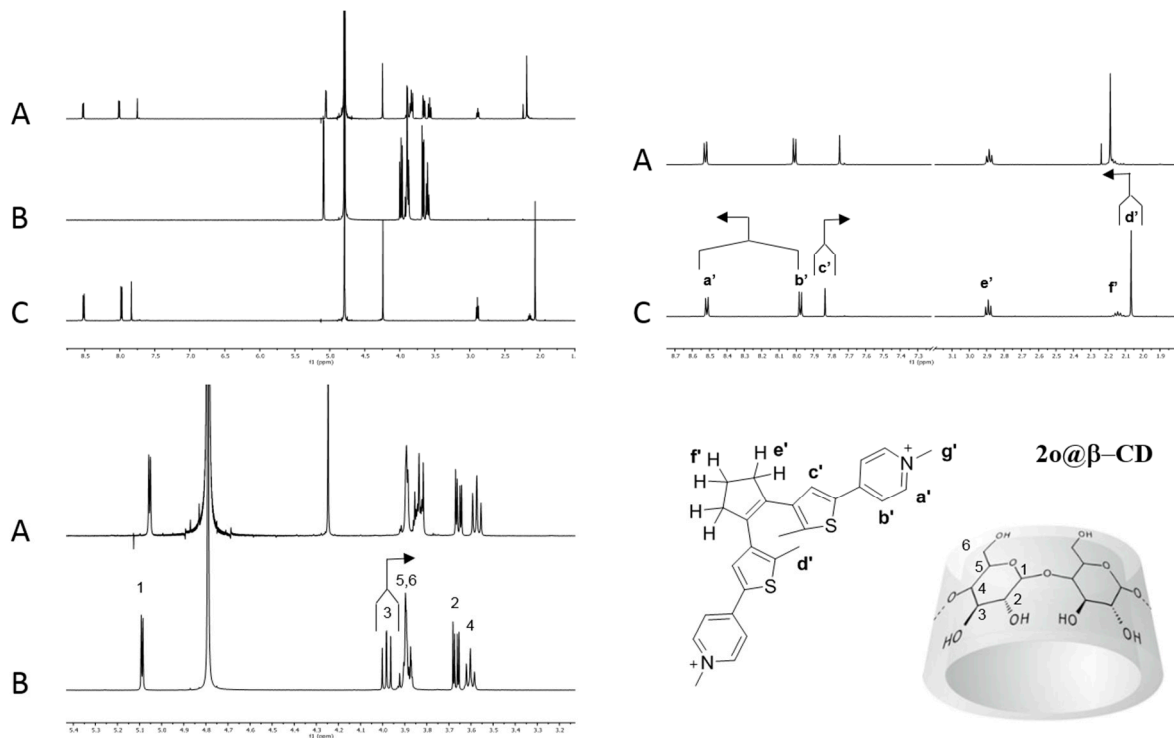

**Figure S3.** Cyclodextrin recognition of photochrome **2o**. **A)** **2o** (7.00  $\cdot$  10<sup>-3</sup> M) +  $\beta$ -CD (7.00  $\cdot$  10<sup>-3</sup> M) in D<sub>2</sub>O; **B)**  $\beta$ -CD (7.00  $\cdot$  10<sup>-3</sup> M) in D<sub>2</sub>O; **C)** **2o** (7.00  $\cdot$  10<sup>-3</sup> M) in D<sub>2</sub>O.

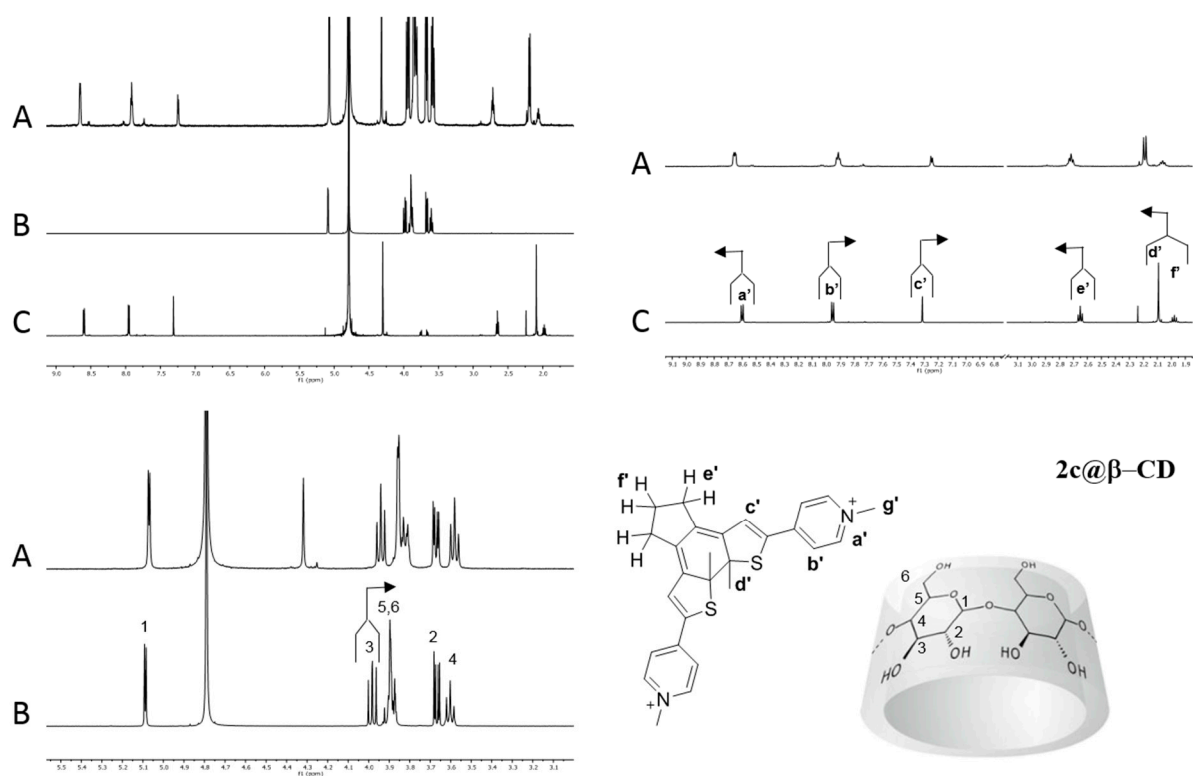

**Figure S4.** Cyclodextrin recognition of photochrome **2c**. **A)** **2c** (7.00·10<sup>-3</sup> M) +  $\beta$ -CD (7.00·10<sup>-3</sup> M) in D<sub>2</sub>O; **B)**  $\beta$ -CD (7.00·10<sup>-3</sup> M) in D<sub>2</sub>O; **C)** **2c** (7.00·10<sup>-3</sup> M) in D<sub>2</sub>O.

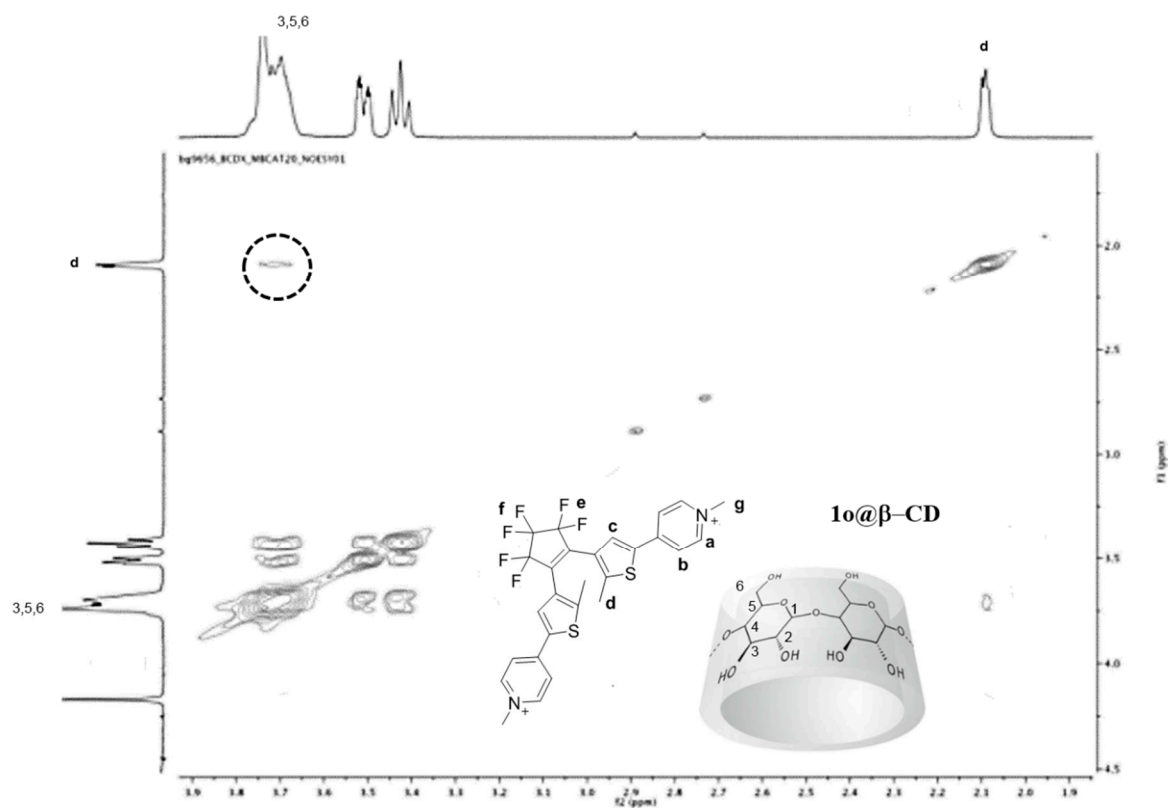

**Figure S5.** Proton **d** area expansion of NOESY  $^1\text{H}$ -NMR of **1o** (7.00·10<sup>-3</sup> M) +  $\beta$ -CD (7.00·10<sup>-2</sup> M) in D<sub>2</sub>O.

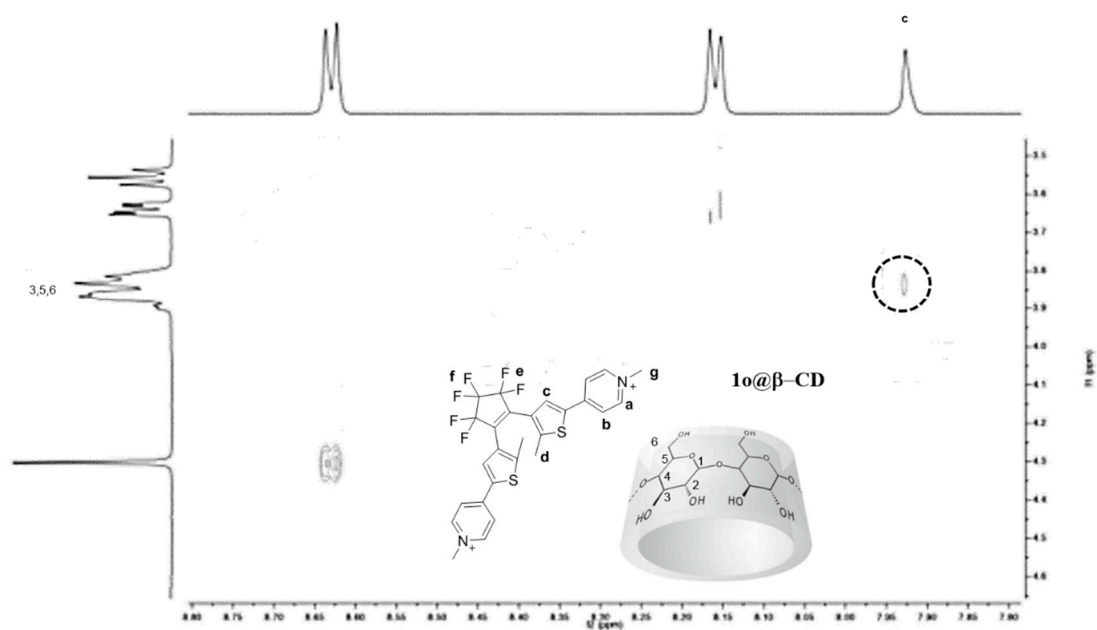

**Figure S6.** Proton *c* area expansion of NOESY  $^1\text{H}$ -NMR of **1o** ( $7.00 \cdot 10^{-3}$  M) +  **$\beta$ -CD** ( $7.00 \cdot 10^{-2}$  M) in  $\text{D}_2\text{O}$ .

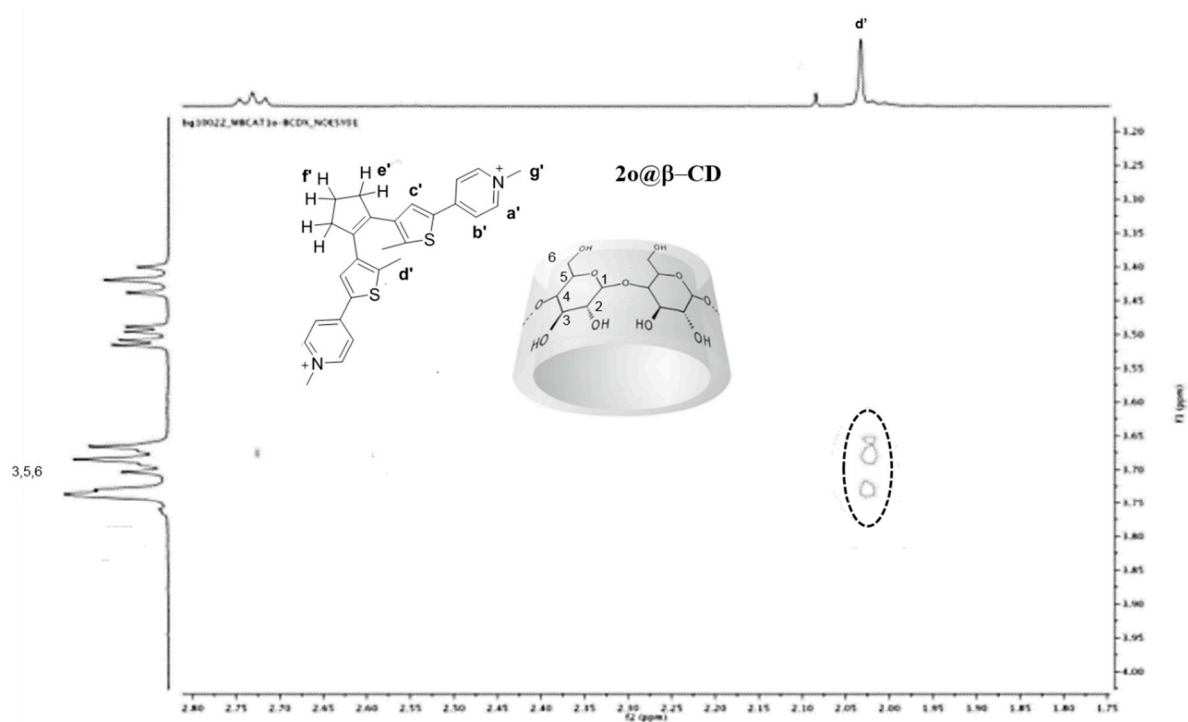

**Figure S7.** Proton *d'* area expansion of NOESY  $^1\text{H}$ -NMR of **2o** ( $7.00 \cdot 10^{-3}$  M) +  **$\beta$ -CD** ( $7.00 \cdot 10^{-2}$  M) in  $\text{D}_2\text{O}$ .

**Table S1.** Diffusion coefficients for  **$\beta$ -CD**, **1o**, **1c** and their inclusion complexes **1o@ $\beta$ -CD**, **1c@ $\beta$ -CD** determined by  $^1\text{H}$ -NMR DOSY.

| #               | 1o D ( $\text{m}^2\cdot\text{s}^{-1}$ ) | 1c D ( $\text{m}^2\cdot\text{s}^{-1}$ ) | $\beta$ -CD ( $\text{m}^2\cdot\text{s}^{-1}$ ) |
|-----------------|-----------------------------------------|-----------------------------------------|------------------------------------------------|
| 1o              | $4.8\cdot 10^{-10}$                     | -                                       | -                                              |
| 1c              | -                                       | $4.7\cdot 10^{-10}$                     | -                                              |
| $\beta$ -CD     | -                                       | -                                       | $3.3\cdot 10^{-10}$                            |
| 1o@ $\beta$ -CD | $3.0\cdot 10^{-10}$                     | -                                       | $3.0\cdot 10^{-10}$                            |
| 1c@ $\beta$ -CD | $3.0\cdot 10^{-10}$                     | -                                       | $3.0\cdot 10^{-10}$                            |

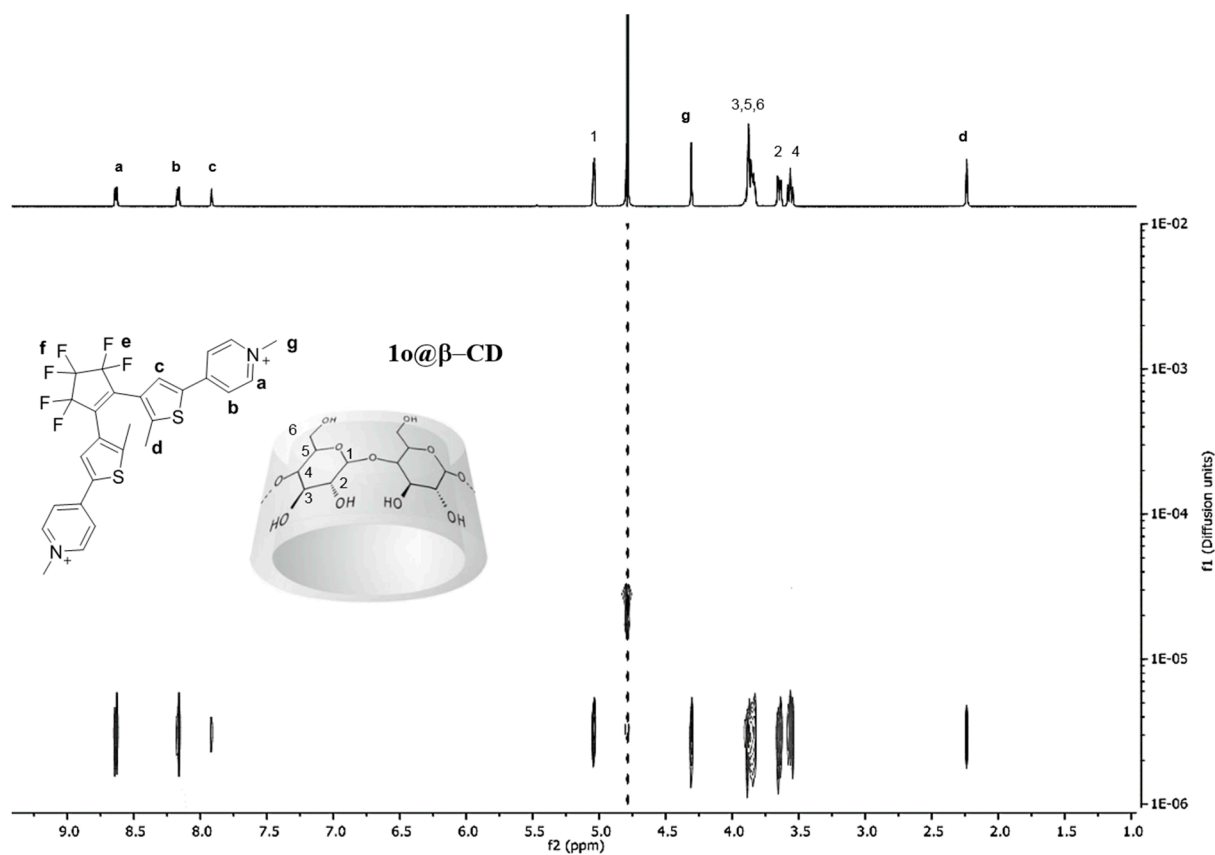

**Figure S8.** DOSY: **1o** ( $7.00\cdot 10^{-3}$  M) +  **$\beta$ -CD** ( $7.00\cdot 10^{-3}$  M) diffusing at the same rate in  $\text{D}_2\text{O}$ .

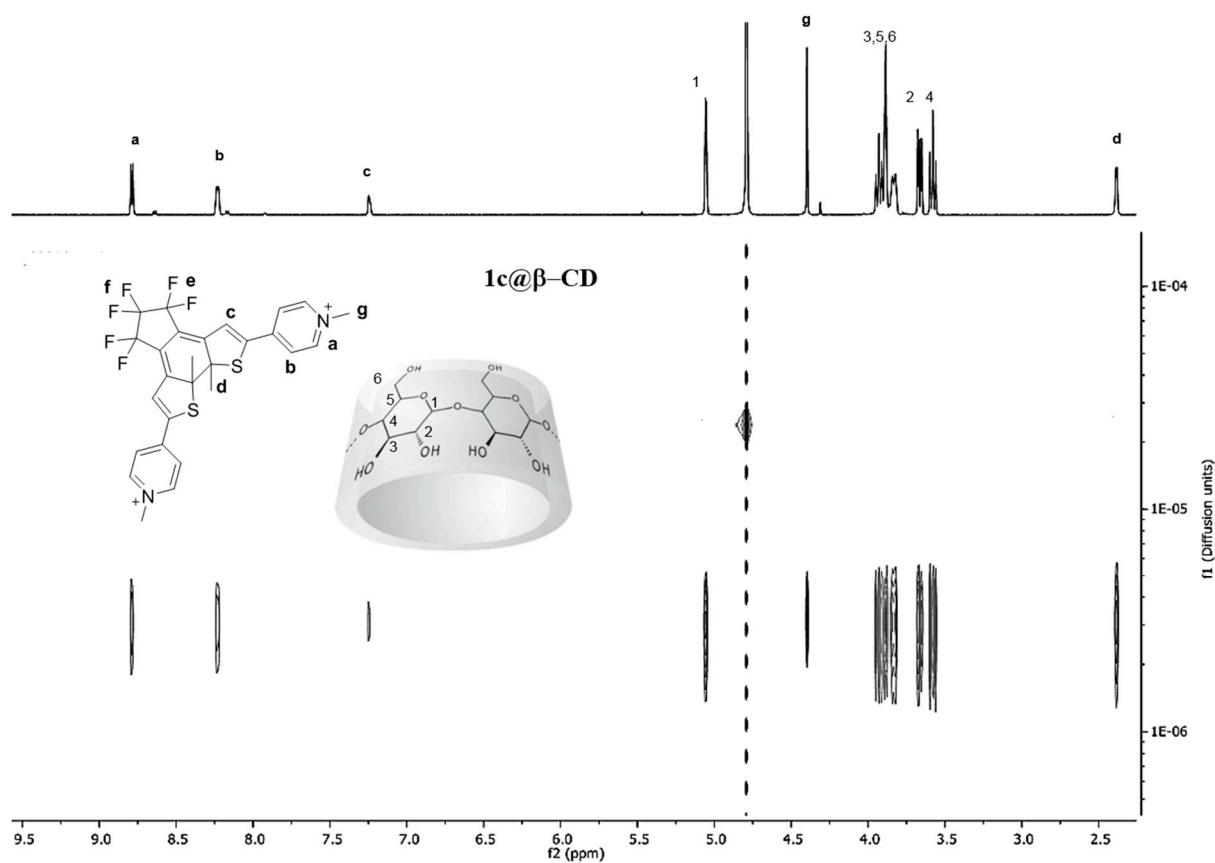

**Figure S9.** DOSY: **1c** ( $7.00 \cdot 10^{-3}$  M) +  **$\beta$ -CD** ( $7.00 \cdot 10^{-3}$  M) diffusing at the same rate in  $D_2O$ .

**Table S2.** Diffusion coefficients for  **$\beta$ -CD**, **2o**, **2c** and their inclusion complexes **2o@ $\beta$ -CD**, **2c@ $\beta$ -CD** determined by  $^1H$ -NMR DOSY.

| #                               | 2o D ( $m^2 \cdot s^{-1}$ ) | 2c D ( $m^2 \cdot s^{-1}$ ) | $\beta$ -CD ( $m^2 \cdot s^{-1}$ ) |
|---------------------------------|-----------------------------|-----------------------------|------------------------------------|
| <b>2o</b>                       | $4.7 \cdot 10^{-10}$        | -                           | -                                  |
| <b>2c</b>                       | -                           | $4.9 \cdot 10^{-10}$        | -                                  |
| <b><math>\beta</math>-CD</b>    | -                           | -                           | $3.3 \cdot 10^{-10}$               |
| <b>2o@<math>\beta</math>-CD</b> | $3.0 \cdot 10^{-10}$        | -                           | $3.1 \cdot 10^{-10}$               |
| <b>2c@<math>\beta</math>-CD</b> | $3.0 \cdot 10^{-10}$        | -                           | $3.1 \cdot 10^{-10}$               |



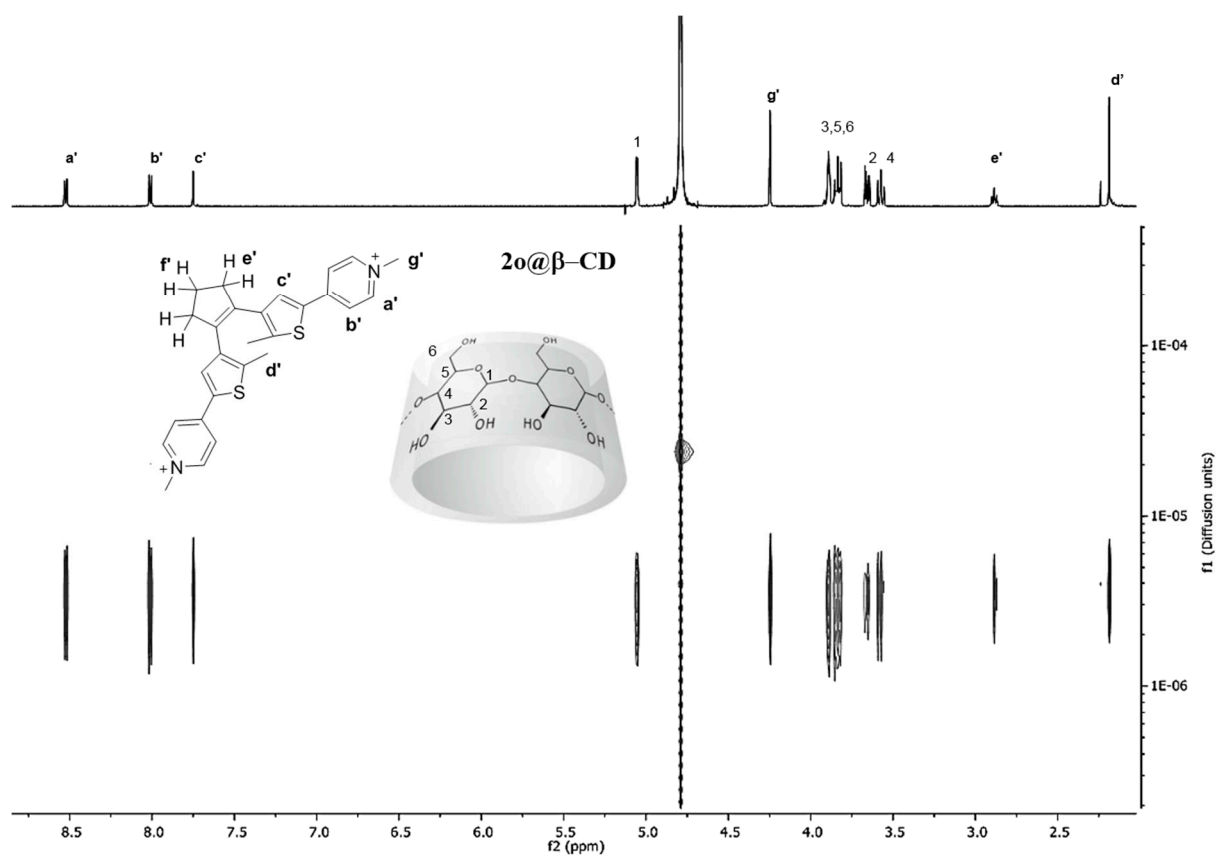

**Figure S10. DOSY: **2o** ( $7.00 \cdot 10^{-3}$  M) +  $\beta$ -CD ( $7.00 \cdot 10^{-3}$  M) diffusing at the same rate in  $D_2O$ .**

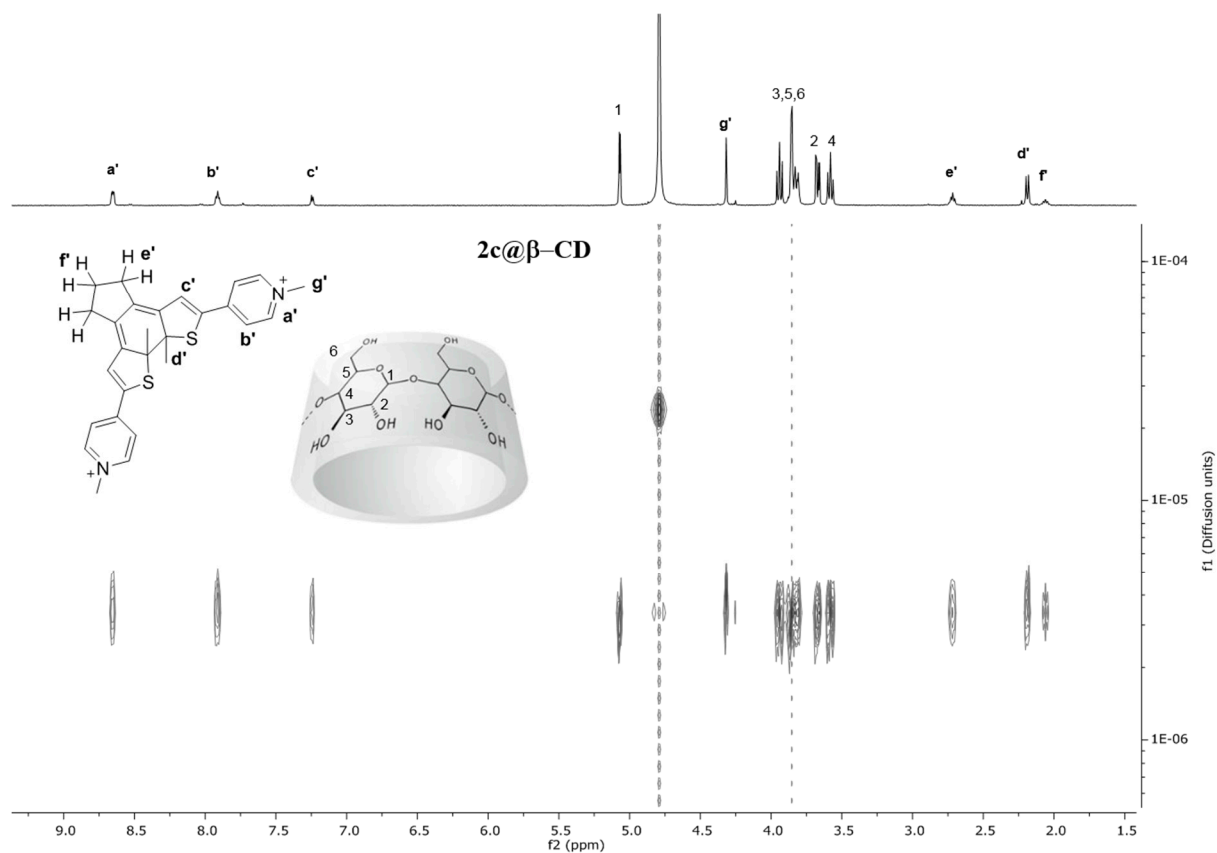

**Figure S11. DOSY: **2c** ( $7.00 \cdot 10^{-3}$  M) +  $\beta$ -CD ( $7.00 \cdot 10^{-3}$  M) diffusing at the same rate in  $D_2O$ .**

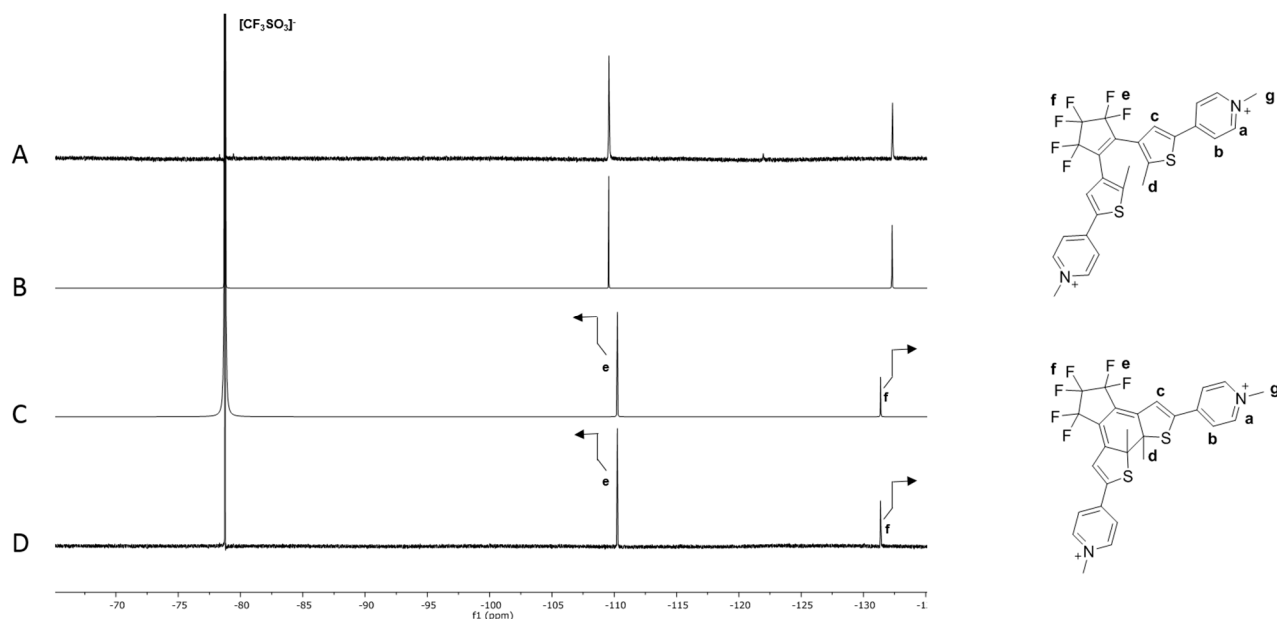

**Figure S12.** Cyclodextrin recognition of photochrome **1o** and **1c**,  $^{19}\text{F}$ -NMR. **A)** **1o** ( $7.00 \cdot 10^{-3}$  M) +  $\beta$ -CD ( $7.00 \cdot 10^{-3}$  M) in  $\text{D}_2\text{O}$ ; **B)** **1c** ( $7.00 \cdot 10^{-3}$  M) +  $\beta$ -CD ( $7.00 \cdot 10^{-3}$  M) in  $\text{D}_2\text{O}$ ; **C)** **1o** ( $7.00 \cdot 10^{-3}$  M) in  $\text{D}_2\text{O}$ ; **D)** **1c** ( $7.00 \cdot 10^{-3}$  M) in  $\text{D}_2\text{O}$ .

### Inclusion complexes **1o**@ $\beta$ -CD Job's plots.

Different deuterium oxide solutions characterised by having the same final total concentration (*host + guest species*,  $7.02 \cdot 10^{-2}$  M) but different amounts of  $\beta$ -cyclodextrin and **1o** or **1c** were prepared and analysed by  $^1\text{H}$ -NMR. In Table S3 are reported the different combinations and the data used for the Job's plot of **1o**@ $\beta$ -CD. The ordinate in the modified Job plot is proportional to the concentration of the inclusion complex ( $[\mathbf{1o@}\beta\text{-CD}]$ ; the ratio between the association constants can be expressed by the following equation:

$$\frac{K_{\mathbf{1o@}\beta\text{CD}}}{K_{\mathbf{1c@}\beta\text{CD}}} = \frac{[\mathbf{1o@}\beta\text{CD}]}{[\mathbf{1c@}\beta\text{CD}]} \cdot \frac{([\mathbf{1o}]_0 - [\mathbf{1c@}\beta\text{CD}])^2}{([\mathbf{1o}]_0 - [\mathbf{1o@}\beta\text{CD}])^2}$$

**Table S3.** **1o**@ $\beta$ -CD Job's plot data and data treatment.

| [ <b>1o</b> ] (M)    | [ $\beta$ -CD] (M)   | $\chi_{\mathbf{1o}}^a$ | $\chi_{\beta\text{-CD}}^b$ | $\delta(\text{ppm})^c$ | $\Delta\delta(\text{ppm})^d$ | $\Delta\delta[\mathbf{1o}]$ |
|----------------------|----------------------|------------------------|----------------------------|------------------------|------------------------------|-----------------------------|
| 0.00                 | $7.02 \cdot 10^{-4}$ | 0.00                   | 1.00                       | 0.000                  | 0.000                        | 0.00                        |
| $8.77 \cdot 10^{-5}$ | $6.14 \cdot 10^{-4}$ | 0.13                   | 0.88                       | 2.223                  | 0.151                        | $1.32 \cdot 10^{-5}$        |
| $1.75 \cdot 10^{-4}$ | $5.26 \cdot 10^{-4}$ | 0.25                   | 0.75                       | 2.208                  | 0.136                        | $2.38 \cdot 10^{-5}$        |
| $2.63 \cdot 10^{-4}$ | $4.39 \cdot 10^{-4}$ | 0.38                   | 0.63                       | 2.192                  | 0.120                        | $3.16 \cdot 10^{-5}$        |
| $3.51 \cdot 10^{-4}$ | $3.51 \cdot 10^{-4}$ | 0.50                   | 0.50                       | 2.173                  | 0.101                        | $3.55 \cdot 10^{-5}$        |
| $4.39 \cdot 10^{-4}$ | $2.63 \cdot 10^{-4}$ | 0.63                   | 0.38                       | 2.148                  | 0.076                        | $3.34 \cdot 10^{-5}$        |
| $5.26 \cdot 10^{-4}$ | $1.75 \cdot 10^{-4}$ | 0.75                   | 0.25                       | 2.121                  | 0.049                        | $2.58 \cdot 10^{-5}$        |
| $6.14 \cdot 10^{-4}$ | $8.77 \cdot 10^{-5}$ | 0.88                   | 0.13                       | 2.095                  | 0.023                        | $1.41 \cdot 10^{-5}$        |
| $7.02 \cdot 10^{-4}$ | 0.00                 | 1.00                   | 0.00                       | 2.072                  | 0.000                        | 0.00                        |

a) **1o** molar fraction; b)  $\beta$ -CD molar fraction; c) chemical shift of the methyl unit attached to the thiophene ring (d); d) chemical shift difference with respect  $\beta$ -cyclodextrin free sample.

**Table S4.** **1c**@ $\beta$ -CD Job's plot data and data treatment.

| [ <b>1c</b> ] (M) | [ $\beta$ -CD] (M) | $\chi_{\mathbf{1c}}^a$ | $\chi_{\beta\text{-CD}}^b$ | $\delta(\text{ppm})^c$ | $\Delta\delta(\text{ppm})^d$ | $\Delta\delta[\mathbf{1c}]$ |
|-------------------|--------------------|------------------------|----------------------------|------------------------|------------------------------|-----------------------------|
|-------------------|--------------------|------------------------|----------------------------|------------------------|------------------------------|-----------------------------|

|                      |                      |      |      |       |       |                      |
|----------------------|----------------------|------|------|-------|-------|----------------------|
| 0.00                 | $7.02 \cdot 10^{-4}$ | 0.00 | 1.00 | 0.000 | 0.000 | 0.00                 |
| $8.77 \cdot 10^{-5}$ | $6.14 \cdot 10^{-4}$ | 0.13 | 0.88 | 2.368 | 0.041 | $3.60 \cdot 10^{-6}$ |
| $1.75 \cdot 10^{-4}$ | $5.26 \cdot 10^{-4}$ | 0.25 | 0.75 | 2.363 | 0.036 | $6.30 \cdot 10^{-6}$ |
| $2.63 \cdot 10^{-4}$ | $4.39 \cdot 10^{-4}$ | 0.38 | 0.63 | 2.354 | 0.027 | $7.10 \cdot 10^{-6}$ |
| $3.51 \cdot 10^{-4}$ | $3.51 \cdot 10^{-4}$ | 0.50 | 0.50 | 2.351 | 0.024 | $8.42 \cdot 10^{-6}$ |
| $4.39 \cdot 10^{-4}$ | $2.63 \cdot 10^{-4}$ | 0.63 | 0.38 | 2.345 | 0.018 | $7.90 \cdot 10^{-6}$ |
| $5.26 \cdot 10^{-4}$ | $1.75 \cdot 10^{-4}$ | 0.75 | 0.25 | 2.338 | 0.011 | $5.79 \cdot 10^{-6}$ |
| $6.14 \cdot 10^{-4}$ | $8.77 \cdot 10^{-5}$ | 0.88 | 0.13 | 2.334 | 0.007 | $4.30 \cdot 10^{-6}$ |
| $7.02 \cdot 10^{-4}$ | 0.00                 | 1.00 | 0.00 | 2.327 | 0.000 | 0.00                 |

a) **1c** molar fraction; b)  **$\beta$ -CD** molar fraction; c) chemical shift of the methyl unit attached to the thiophene ring (*d*); d) chemical shift difference with respect  $\beta$ -cyclodextrin free sample.

### Inclusion complexes **2@ $\beta$ -CD** Job's plots.

Different deuterium oxide solutions characterised by having the same final total concentration (*host + guest* species,  $7.02 \cdot 10^{-2}$  M) but different amounts of  $\beta$ -cyclodextrin and **2o** or **2c** were prepared and analysed by  $^1\text{H}$ -NMR. In **Error! Reference source not found.** are reported the different combinations and the data used for the Job's plot of **2o@ $\beta$ -CD**.

**Table S5.** **2o@ $\beta$ -CD** Job's plot data and data treatment.

| [ <b>2o</b> ] (M)    | [ <b><math>\beta</math>-CD</b> ] (M) | $\chi_{2o}^a$ | $\chi_{\beta\text{-CD}}^b$ | $\delta(\text{ppm})^c$ | $\Delta\delta(\text{ppm})^d$ | $\Delta\delta[\text{2o}]$ |
|----------------------|--------------------------------------|---------------|----------------------------|------------------------|------------------------------|---------------------------|
| 0.00                 | $7.02 \cdot 10^{-4}$                 | 0.00          | 1.00                       | 0.000                  | 0.000                        | 0.00                      |
| $8.77 \cdot 10^{-5}$ | $6.14 \cdot 10^{-4}$                 | 0.13          | 0.88                       | 2.138                  | 0.084                        | $7.37 \cdot 10^{-6}$      |
| $1.75 \cdot 10^{-4}$ | $5.26 \cdot 10^{-4}$                 | 0.25          | 0.75                       | 2.128                  | 0.074                        | $1.30 \cdot 10^{-5}$      |
| $2.63 \cdot 10^{-4}$ | $4.39 \cdot 10^{-4}$                 | 0.38          | 0.63                       | 2.118                  | 0.064                        | $1.68 \cdot 10^{-5}$      |
| $3.51 \cdot 10^{-4}$ | $3.51 \cdot 10^{-4}$                 | 0.50          | 0.50                       | 2.103                  | 0.049                        | $1.72 \cdot 10^{-5}$      |
| $4.39 \cdot 10^{-4}$ | $2.63 \cdot 10^{-4}$                 | 0.63          | 0.38                       | 2.090                  | 0.036                        | $1.58 \cdot 10^{-5}$      |
| $5.26 \cdot 10^{-4}$ | $1.75 \cdot 10^{-4}$                 | 0.75          | 0.25                       | 2.073                  | 0.019                        | $1.00 \cdot 10^{-5}$      |
| $6.14 \cdot 10^{-4}$ | $8.77 \cdot 10^{-5}$                 | 0.88          | 0.13                       | 2.066                  | 0.012                        | $7.37 \cdot 10^{-6}$      |
| $7.02 \cdot 10^{-4}$ | 0.00                                 | 1.00          | 0.00                       | 2.054                  | 0.000                        | 0.00                      |

a) **2o** molar fraction; b)  **$\beta$ -CD** molar fraction; c) chemical shift of the methyl unit attached to the thiophene ring (*d*); d) chemical shift difference with respect  $\beta$ -cyclodextrin free sample.

**Table S6.** **2c@ $\beta$ -CD** Job's plot data and data treatment.

| [ <b>2c</b> ] (M)    | [ <b><math>\beta</math>-CD</b> ] (M) | $\chi_{2c}^a$ | $\chi_{\beta\text{-CD}}^b$ | $\delta(\text{ppm})^c$ | $\Delta\delta(\text{ppm})^d$ | $\Delta\delta[\text{2c}]$ |
|----------------------|--------------------------------------|---------------|----------------------------|------------------------|------------------------------|---------------------------|
| 0.00                 | $7.02 \cdot 10^{-4}$                 | 0.00          | 1.00                       | 0.000                  | 0.000                        | 0.00                      |
| $8.77 \cdot 10^{-5}$ | $6.14 \cdot 10^{-4}$                 | 0.13          | 0.88                       | 2.028                  | 0.048                        | $4.21 \cdot 10^{-6}$      |
| $1.75 \cdot 10^{-4}$ | $5.26 \cdot 10^{-4}$                 | 0.25          | 0.75                       | 2.018                  | 0.038                        | $6.67 \cdot 10^{-6}$      |
| $2.63 \cdot 10^{-4}$ | $4.39 \cdot 10^{-4}$                 | 0.38          | 0.63                       | 2.016                  | 0.036                        | $9.47 \cdot 10^{-6}$      |
| $3.51 \cdot 10^{-4}$ | $3.51 \cdot 10^{-4}$                 | 0.50          | 0.50                       | 2.007                  | 0.027                        | $9.47 \cdot 10^{-6}$      |
| $4.39 \cdot 10^{-4}$ | $2.63 \cdot 10^{-4}$                 | 0.63          | 0.38                       | 1.999                  | 0.019                        | $8.33 \cdot 10^{-6}$      |
| $5.26 \cdot 10^{-4}$ | $1.75 \cdot 10^{-4}$                 | 0.75          | 0.25                       | 1.992                  | 0.012                        | $6.31 \cdot 10^{-6}$      |
| $6.14 \cdot 10^{-4}$ | $8.77 \cdot 10^{-5}$                 | 0.88          | 0.13                       | 1.988                  | 0.008                        | $4.91 \cdot 10^{-6}$      |
| $7.02 \cdot 10^{-4}$ | 0.00                                 | 1.00          | 0.00                       | 1.980                  | 0.000                        | 0.00                      |

a) **2c** molar fraction; b)  **$\beta$ -CD** molar fraction; c) chemical shift of the methyl unit attached to the thiophene ring (*d*); d) chemical shift difference with respect  $\beta$ -cyclodextrin free sample.

### Determination of **1@ $\beta$ -CD** association constants ( $K_{Ass}$ )

**1o** and **1c** deuterium oxide solutions ( $2.35 \cdot 10^{-3}$  M) have been titrated with increasing amounts of  $\beta$ -cyclodextrin till no variation of chemical shift was observed in  $^1\text{H}$ -NMR spectra. In Table

S7 are reported the data obtained and later used for the determination of the  $K_{Ass}$  of **1o@ $\beta$ -CD** by means of the non-linear least-squares method.

**Table S7.** Data from **1o** titration with  $\beta$ -CD.

| <b>[<math>\beta</math>-CD] (M)</b> | <b><math>\delta</math>(ppm)<sup>a</sup></b> | <b><math>\Delta\delta</math>(ppm)<sup>b</sup></b> |
|------------------------------------|---------------------------------------------|---------------------------------------------------|
| 0.00                               | 2.068                                       | 0.000                                             |
| $1.22 \cdot 10^{-3}$               | 2.163                                       | 0.095                                             |
| $2.44 \cdot 10^{-3}$               | 2.222                                       | 0.154                                             |
| $3.80 \cdot 10^{-3}$               | 2.245                                       | 0.177                                             |
| $5.15 \cdot 10^{-3}$               | 2.254                                       | 0.186                                             |
| $6.51 \cdot 10^{-3}$               | 2.260                                       | 0.192                                             |
| $7.73 \cdot 10^{-3}$               | 2.262                                       | 0.194                                             |
| $9.08 \cdot 10^{-3}$               | 2.263                                       | 0.195                                             |
| $1.27 \cdot 10^{-2}$               | 2.265                                       | 0.197                                             |
| $1.97 \cdot 10^{-2}$               | 2.265                                       | 0.197                                             |
| $2.66 \cdot 10^{-2}$               | 2.265                                       | 0.197                                             |

a) chemical shift of the methyl unit attached to the thiophene ring ( $d$ ); b) chemical shift difference with respect  $\beta$ -cyclodextrin free sample.

In Table S8 are reported the data obtained and later used for the determination of the  $K_{Ass}$  of **1c@ $\beta$ -CD** by means of the non-linear least-squares method.

**Table S8.** Data from **1c** titration with  $\beta$ -CD

| <b>[<math>\beta</math>-CD] (M)</b> | <b><math>\delta</math>(ppm)<sup>a</sup></b> | <b><math>\Delta\delta</math>(ppm)<sup>b</sup></b> |
|------------------------------------|---------------------------------------------|---------------------------------------------------|
| 0.00                               | 2.320                                       | 0.000                                             |
| $1.22 \cdot 10^{-3}$               | 2.361                                       | 0.041                                             |
| $2.44 \cdot 10^{-3}$               | 2.392                                       | 0.072                                             |
| $4.20 \cdot 10^{-3}$               | 2.409                                       | 0.089                                             |
| $5.69 \cdot 10^{-3}$               | 2.418                                       | 0.098                                             |
| $6.78 \cdot 10^{-3}$               | 2.420                                       | 0.100                                             |
| $8.00 \cdot 10^{-3}$               | 2.423                                       | 0.103                                             |
| $9.62 \cdot 10^{-3}$               | 2.427                                       | 0.107                                             |
| $1.36 \cdot 10^{-2}$               | 2.429                                       | 0.109                                             |
| $1.05 \cdot 10^{-2}$               | 2.431                                       | 0.111                                             |
| $2.72 \cdot 10^{-2}$               | 2.432                                       | 0.112                                             |

a) chemical shift of the methyl unit attached to the thiophene ring ( $d$ ); b) chemical shift difference with respect  $\beta$ -cyclodextrin free sample.

### Determination of **2@ $\beta$ -CD** association constants ( $K_{Ass}$ )

**2o** and **2c** deuterium oxide solutions ( $2.15 \cdot 10^{-3}$  M) have been titrated with increasing amounts of  $\beta$ -cyclodextrin till no variation of chemical shift was observed in  $^1\text{H}$ -NMR spectra. In Table S9 are reported the data obtained and later used for the determination of the  $K_{Ass}$  of **2o@ $\beta$ -CD** by means of the non-linear least-squares method.

**Table S9.** Data from **2o** titration with  $\beta$ -cyclodextrin

| <b>[<math>\beta</math>-CD] (M)</b> | <b><math>\delta</math>(ppm)<sup>a</sup></b> | <b><math>\Delta\delta</math>(ppm)<sup>b</sup></b> |
|------------------------------------|---------------------------------------------|---------------------------------------------------|
| 0.00                               | 1.961                                       | 0.000                                             |
| $1.36 \cdot 10^{-3}$               | 2.061                                       | 0.100                                             |
| $2.71 \cdot 10^{-3}$               | 2.100                                       | 0.139                                             |
| $4.07 \cdot 10^{-3}$               | 2.133                                       | 0.172                                             |

|                      |       |       |
|----------------------|-------|-------|
| $5.42 \cdot 10^{-3}$ | 2.157 | 0.196 |
| $6.78 \cdot 10^{-3}$ | 2.176 | 0.215 |
| $8.13 \cdot 10^{-3}$ | 2.185 | 0.224 |
| $9.49 \cdot 10^{-3}$ | 2.191 | 0.230 |
| $1.36 \cdot 10^{-2}$ | 2.204 | 0.243 |
| $2.03 \cdot 10^{-2}$ | 2.209 | 0.248 |
| $2.71 \cdot 10^{-2}$ | 2.211 | 0.250 |

a) chemical shift of the methyl unit attached to the thiophene ring (*d*); b) chemical shift difference with respect  $\beta$ -cyclodextrin free sample.

In Table S10 are reported the data obtained and later used for the determination of the  $K_{Ass}$  of **2c@ $\beta$ -CD** by means of the non-linear least-squares method.

**Table S10.** Data from **2c** titration with  $\beta$ -cyclodextrin

| <b>[<math>\beta</math>-CD] (M)</b> | <b><math>\delta</math>(ppm)<sup>a</sup></b> | <b><math>\Delta\delta</math>(ppm)<sup>b</sup></b> |
|------------------------------------|---------------------------------------------|---------------------------------------------------|
| 0.00                               | 2.001                                       | 0.000                                             |
| $1.36 \cdot 10^{-3}$               | 2.057                                       | 0.056                                             |
| $2.71 \cdot 10^{-3}$               | 2.086                                       | 0.085                                             |
| $4.07 \cdot 10^{-3}$               | 2.097                                       | 0.096                                             |
| $5.42 \cdot 10^{-3}$               | 2.106                                       | 0.105                                             |
| $6.78 \cdot 10^{-3}$               | 2.120                                       | 0.119                                             |
| $8.13 \cdot 10^{-3}$               | 2.130                                       | 0.129                                             |
| $9.49 \cdot 10^{-3}$               | 2.135                                       | 0.134                                             |
| $1.36 \cdot 10^{-2}$               | 2.142                                       | 0.141                                             |
| $2.03 \cdot 10^{-2}$               | 2.142                                       | 0.141                                             |
| $2.71 \cdot 10^{-2}$               | 2.144                                       | 0.143                                             |

a) chemical shift of the methyl unit attached to the thiophene ring (*d*); b) chemical shift difference with respect  $\beta$ -cyclodextrin free sample.
